# Supplementary material for: A Case of Plant Vaccination: Enhancement of Plant Immunity against Verticillium dahliae by Necrotized Spores of the Pathogen
Source: MDPI journal article supplement (doi:10.3390/plants11131691), 2022-06-26
Supplement: s1 [file s1]

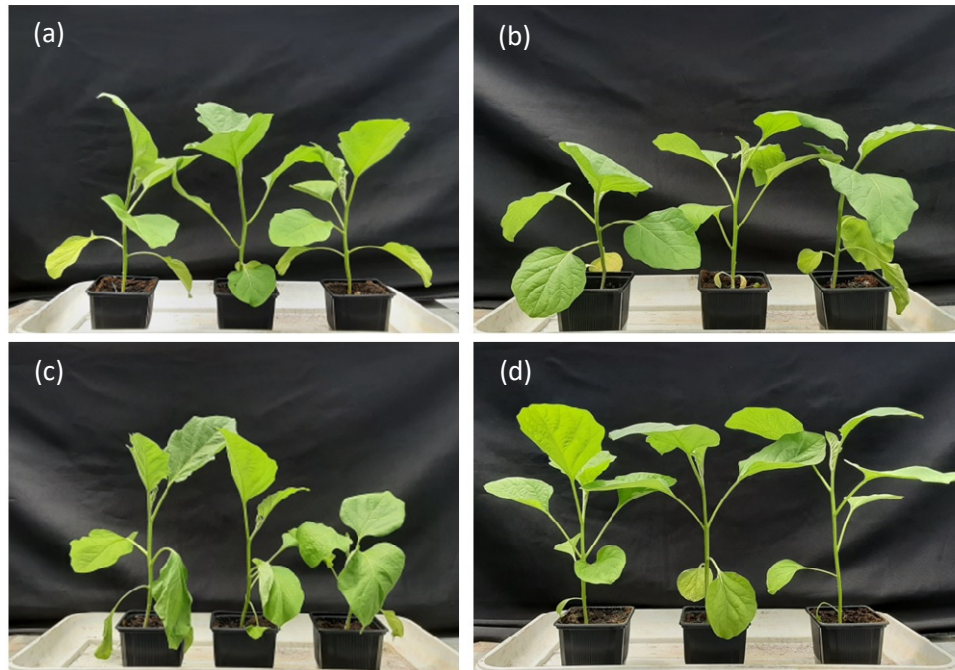

Supplementary Figure S1: Verticillium wilt symptoms caused on eggplants stem injected (a) or root drenched (b) with autoclaved spores of *V. dahliae*, controls (*V. dahliae* inoculated) (c) and mock inoculated plants (d). The photograph was taken at 25 dpi.
